# Supplementary material
Source: PubMed Central journal article supplement (PMC6662189)

# Xu, et al. Supplemental Figure

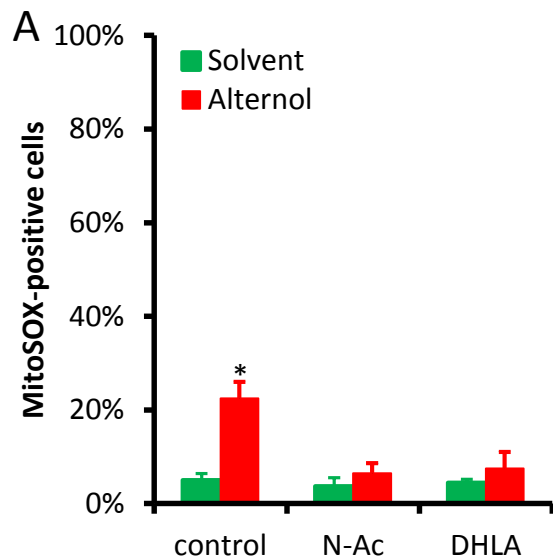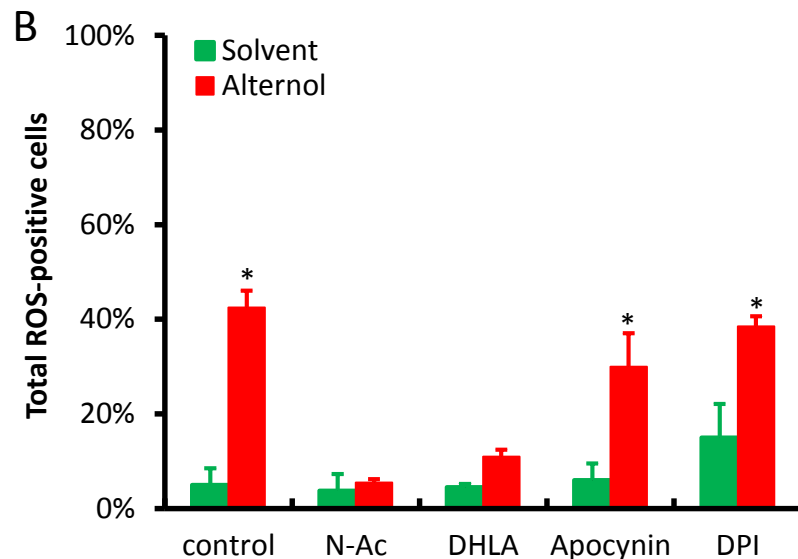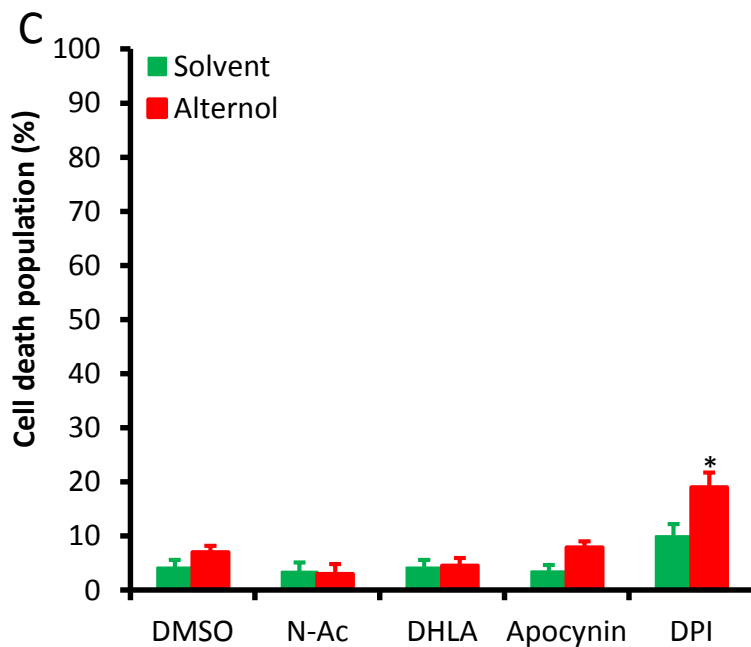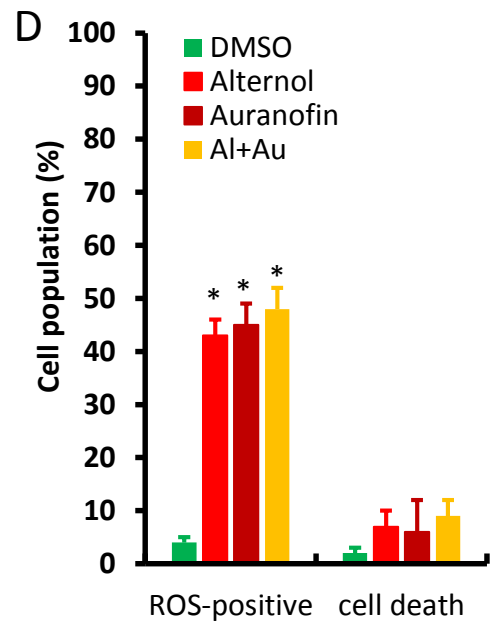

Supplement: NIHMS1530843-supplement-2.pdf [file NIHMS1530843-supplement-2.pdf]
